# Supplementary material
Source: PubMed Central journal article supplement (PMC4368502)

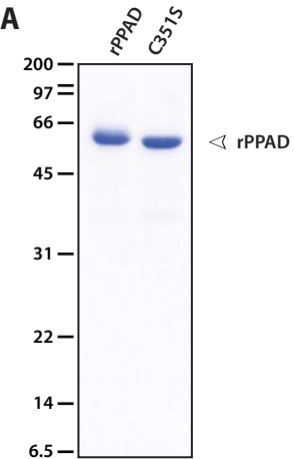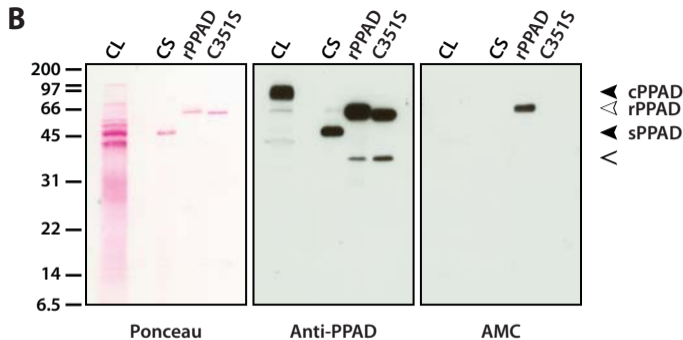

Supplement: NIHMS669861-supplement-Fig_S1.pdf [file NIHMS669861-supplement-Fig_S1.pdf]
